# Supplementary material
Source: publisher figshare collection journal article supplement (https://sage.figshare.com/ndownloader/files/12388769)
Supplement: Supplementary file 1 [file 12388769]

**CONSORT 2010 checklist of information to include when reporting a cluster randomised trial**

| Section/Topic                    | Item No | Standard Checklist item                                                                                                                | Extension for cluster designs                                                                 | Page No *                                                                  |
|----------------------------------|---------|----------------------------------------------------------------------------------------------------------------------------------------|-----------------------------------------------------------------------------------------------|----------------------------------------------------------------------------|
| <b>Title and abstract</b>        |         |                                                                                                                                        |                                                                                               |                                                                            |
|                                  | 1a      | Identification as a randomised trial in the title                                                                                      | Identification as a cluster randomised trial in the title                                     | Title (p.1)                                                                |
|                                  | 1b      | Structured summary of trial design, methods, results, and conclusions (for specific guidance see CONSORT for abstracts) <sup>1,2</sup> | See table 2                                                                                   | Abstract (p. 1)                                                            |
| <b>Introduction</b>              |         |                                                                                                                                        |                                                                                               |                                                                            |
| <b>Background and objectives</b> | 2a      | Scientific background and explanation of rationale                                                                                     | Rationale for using a cluster design                                                          | Design sub-section of Methods section (p.7)                                |
|                                  | 2b      | Specific objectives or hypotheses                                                                                                      | Whether objectives pertain to the the cluster level, the individual participant level or both | Introduction (pp.6-7) – objectives and hypotheses both at individual level |
| <b>Methods</b>                   |         |                                                                                                                                        |                                                                                               |                                                                            |
| <b>Trial design</b>              | 3a      | Description of trial design (such as parallel, factorial) including allocation ratio                                                   | Definition of cluster and description of how the design features apply to the clusters        | Design sub-section of Methods section (p.7)                                |

|                      |    |                                                                                                                                       |                                                                                                 |                                                                                                                                           |
|----------------------|----|---------------------------------------------------------------------------------------------------------------------------------------|-------------------------------------------------------------------------------------------------|-------------------------------------------------------------------------------------------------------------------------------------------|
|                      | 3b | Important changes to methods after trial commencement (such as eligibility criteria), with reasons                                    |                                                                                                 | NA                                                                                                                                        |
| <b>Participants</b>  | 4a | Eligibility criteria for participants                                                                                                 | Eligibility criteria for clusters                                                               | Participants sub-section of Methods section (pp.7-8)                                                                                      |
|                      | 4b | Settings and locations where the data were collected                                                                                  |                                                                                                 | Procedures sub-section of Methods section (pp.11-12)                                                                                      |
| <b>Interventions</b> | 5  | The interventions for each group with sufficient details to allow replication, including how and when they were actually administered | Whether interventions pertain to the cluster level, the individual participant level or both    | The HSS model in the Introduction section (pp.3-6), The intervention sub-section in the Methods section (pp. 13-14)<br><br>Tables 1 and 2 |
| <b>Outcomes</b>      | 6a | Completely defined pre-specified primary and secondary outcome measures, including how and when they were assessed                    | Whether outcome measures pertain to the cluster level, the individual participant level or both | Introduction (p.6)<br><br>Measures sub-section of Methods section                                                                         |
|                      | 6b | Any changes to trial outcomes after the trial                                                                                         |                                                                                                 | NA                                                                                                                                        |

|                                         |    |                                                                                           |                                                                                                                                                                                                                    |                                                    |
|-----------------------------------------|----|-------------------------------------------------------------------------------------------|--------------------------------------------------------------------------------------------------------------------------------------------------------------------------------------------------------------------|----------------------------------------------------|
|                                         |    | commenced,<br>with reasons                                                                |                                                                                                                                                                                                                    |                                                    |
| <b>Sample size</b>                      | 7a | How sample size was determined                                                            | Method of calculation, number of clusters(s) (and whether equal or unequal cluster sizes are assumed), cluster size, a coefficient of intracluster correlation (ICC or $k$ ), and an indication of its uncertainty | Participants sub-section of Methods section (p. 8) |
|                                         | 7b | When applicable, explanation of any interim analyses and stopping guidelines              |                                                                                                                                                                                                                    | NA                                                 |
| <b>Randomisation:</b>                   |    |                                                                                           |                                                                                                                                                                                                                    |                                                    |
| <b>Sequence generation</b>              | 8a | Method used to generate the random allocation sequence                                    |                                                                                                                                                                                                                    | Procedures sub-section of Methods section (p.12)   |
|                                         | 8b | Type of randomisation; details of any restriction (such as blocking and block size)       | Details of stratification or matching if used                                                                                                                                                                      | No restriction or matching                         |
| <b>Allocation concealment mechanism</b> | 9  | Mechanism used to implement the random allocation sequence (such as sequentially numbered | Specification that allocation was based on clusters rather than individuals and whether allocation concealment (if any) was at the cluster                                                                         | Procedures sub-section of Methods section (p.12)   |

|                       |     |                                                                                                                         |                                                                                                                                                                     |                                                   |
|-----------------------|-----|-------------------------------------------------------------------------------------------------------------------------|---------------------------------------------------------------------------------------------------------------------------------------------------------------------|---------------------------------------------------|
|                       |     | containers), describing any steps taken to conceal the sequence until interventions were assigned                       | level, the individual participant level or both                                                                                                                     |                                                   |
| <b>Implementation</b> | 10  | Who generated the random allocation sequence, who enrolled participants, and who assigned participants to interventions | Replace by 10a, 10b and 10c                                                                                                                                         | Procedures sub-section of Methods section (p.12)  |
|                       | 10a |                                                                                                                         | Who generated the random allocation sequence, who enrolled clusters, and who assigned clusters to interventions                                                     | Procedures sub-section of Methods section (p.12)  |
|                       | 10b |                                                                                                                         | Mechanism by which individual participants were included in clusters for the purposes of the trial (such as complete enumeration, random sampling)                  | Procedures sub-section of Methods section (p. 12) |
|                       | 10c |                                                                                                                         | From whom consent was sought (representatives of the cluster, or individual cluster members, or both), and whether consent was sought before or after randomisation | Procedures sub-section of Methods section (p.12)  |

|                                                             |     |                                                                                                                                          |                                                                                                                                             |                                                                                                                                   |
|-------------------------------------------------------------|-----|------------------------------------------------------------------------------------------------------------------------------------------|---------------------------------------------------------------------------------------------------------------------------------------------|-----------------------------------------------------------------------------------------------------------------------------------|
|                                                             |     |                                                                                                                                          |                                                                                                                                             |                                                                                                                                   |
|                                                             |     |                                                                                                                                          |                                                                                                                                             |                                                                                                                                   |
| <b>Blinding</b>                                             | 11a | If done, who was blinded after assignment to interventions (for example, participants, care providers, those assessing outcomes) and how |                                                                                                                                             | <p>No blinding</p> <p>Design sub-section of Methods section (p.7)</p> <p>Procedures sub-section of Methods section (pp.12-13)</p> |
|                                                             | 11b | If relevant, description of the similarity of interventions                                                                              |                                                                                                                                             |                                                                                                                                   |
| <b>Statistical methods</b>                                  | 12a | Statistical methods used to compare groups for primary and secondary outcomes                                                            | How clustering was taken into account                                                                                                       | Data analysis sub-section of Method section (pp.14-15)                                                                            |
|                                                             | 12b | Methods for additional analyses, such as subgroup analyses and adjusted analyses                                                         |                                                                                                                                             | Data analysis sub-section of Method section (pp. 14-15) – analysis of follow-up data                                              |
| <b>Results</b>                                              |     |                                                                                                                                          |                                                                                                                                             |                                                                                                                                   |
| <b>Participant flow (a diagram is strongly recommended)</b> | 13a | For each group, the numbers of participants who were randomly assigned, received intended treatment, and were analysed                   | For each group, the numbers of clusters that were randomly assigned, received intended treatment, and were analysed for the primary outcome | <p>Figure 1</p> <p>The sample sub-section of Results section (pp.15-16)</p>                                                       |

|                                |     |                                                                                                                                         |                                                                                                                                            |                                                                      |
|--------------------------------|-----|-----------------------------------------------------------------------------------------------------------------------------------------|--------------------------------------------------------------------------------------------------------------------------------------------|----------------------------------------------------------------------|
|                                |     | for the primary outcome                                                                                                                 |                                                                                                                                            |                                                                      |
|                                | 13b | For each group, losses and exclusions after randomisation, together with reasons                                                        | For each group, losses and exclusions for both clusters and individual cluster members                                                     | Figure 1<br><br>The sample sub-section of Results section (pp.15-16) |
| <b>Recruitment</b>             | 14a | Dates defining the periods of recruitment and follow-up                                                                                 |                                                                                                                                            | Procedures sub-section                                               |
|                                | 14b | Why the trial ended or was stopped                                                                                                      |                                                                                                                                            | NA                                                                   |
| <b>Baseline data</b>           | 15  | A table showing baseline demographic and clinical characteristics for each group                                                        | Baseline characteristics for the individual and cluster levels as applicable for each group                                                | Table 3                                                              |
| <b>Numbers analysed</b>        | 16  | For each group, number of participants (denominator) included in each analysis and whether the analysis was by original assigned groups | For each group, number of clusters included in each analysis                                                                               | Table 5                                                              |
| <b>Outcomes and estimation</b> | 17a | For each primary and secondary outcome, results for each group, and the estimated effect size and its precision (such                   | Results at the individual or cluster level as applicable and a coefficient of intracluster correlation (ICC or k) for each primary outcome | Result section                                                       |

|                           |     |                                                                                                                                           |                                                                           |
|---------------------------|-----|-------------------------------------------------------------------------------------------------------------------------------------------|---------------------------------------------------------------------------|
|                           |     | as 95% confidence interval)                                                                                                               |                                                                           |
|                           | 17b | For binary outcomes, presentation of both absolute and relative effect sizes is recommended                                               |                                                                           |
| <b>Ancillary analyses</b> | 18  | Results of any other analyses performed, including subgroup analyses and adjusted analyses, distinguishing pre-specified from exploratory | Results section                                                           |
| <b>Harms</b>              | 19  | All important harms or unintended effects in each group (for specific guidance see CONSORT for harms <sup>3</sup> )                       | NA                                                                        |
| <b>Discussion</b>         |     |                                                                                                                                           |                                                                           |
| <b>Limitations</b>        | 20  | Trial limitations, addressing sources of potential bias, imprecision, and, if relevant, multiplicity of analyses                          | Eighth paragraph of Discussion and Application to Practice section (p.30) |

|                          |    |                                                                                                               |                                                                           |                                                                                                |
|--------------------------|----|---------------------------------------------------------------------------------------------------------------|---------------------------------------------------------------------------|------------------------------------------------------------------------------------------------|
| <b>Generalisability</b>  | 21 | Generalisability (external validity, applicability) of the trial findings                                     | Generalisability to clusters and/or individual participants (as relevant) | Discussion and Application to Practice section                                                 |
| <b>Interpretation</b>    | 22 | Interpretation consistent with results, balancing benefits and harms, and considering other relevant evidence |                                                                           | Discussion and Application to Practice section                                                 |
| <b>Other information</b> |    |                                                                                                               |                                                                           |                                                                                                |
| <b>Registration</b>      | 23 | Registration number and name of trial registry                                                                |                                                                           | Methods section (p.12)<br><br>This study was registered with ISRCTN Registry (ISRCTN16238864). |
| <b>Protocol</b>          | 24 | Where the full trial protocol can be accessed, if available                                                   |                                                                           |                                                                                                |
| <b>Funding</b>           | 25 | Sources of funding and other support (such as supply of drugs), role of funders                               |                                                                           | Quality Education Fund (included in submission information)                                    |

*\* Note: page numbers optional depending on journal requirements*

- 
- <sup>1</sup> Hopewell S, Clarke M, Moher D, Wager E, Middleton P, Altman DG, et al. CONSORT for reporting randomised trials in journal and conference abstracts. *Lancet* 2008, 371:281-283
  - <sup>2</sup> Hopewell S, Clarke M, Moher D, Wager E, Middleton P, Altman DG at al (2008) CONSORT for reporting randomized controlled trials in journal and conference abstracts: explanation and elaboration. *PLoS Med* 5(1): e20
  - <sup>3</sup> Ioannidis JP, Evans SJ, Gotzsche PC, O'Neill RT, Altman DG, Schulz K, Moher D. Better reporting of harms in randomized trials: an extension of the CONSORT statement. *Ann Intern Med* 2004; 141(10):781-788.
